# Supplementary material for: Probing cerebellar involvement in cognition through a meta-analysis of TMS evidence
Source: PubMed Central journal article supplement (PMC8292349; doi:10.1038/s41598-021-94051-5), 2021-07-20
Supplement: 41598_2021_94051_MOESM1_ESM.pdf [file 41598_2021_94051_MOESM1_ESM.pdf]

## Supplementary Material

### Probing cerebellar involvement in cognition through a meta-analysis of TMS evidence

Daniele Gatti<sup>1\*</sup>, Luca Rinaldi<sup>1</sup>, Ioana Cristea<sup>1</sup>, & Tomaso Vecchi<sup>1,2</sup>

<sup>1</sup> *Department of Brain and Behavioral Sciences, University of Pavia, Pavia, Italy*

<sup>2</sup> *Cognitive Psychology Unit, IRCCS Mondino Foundation, Pavia, Italy*

\* Corresponding author:

Daniele Gatti, Department of Brain and Behavioural Science, University of Pavia, Piazza  
Botta 6, 27100 Pavia, Italy. *e-mail address*: [daniele.gatti@unipv.it](mailto:daniele.gatti@unipv.it)

## Additional information

We report below the tables with the number of the studies per condition of the non-significant meta-regressions included in the manuscript.

### Online vs. Offline

Table S2. Study numerosity of the first meta-regression on accuracy.

|        | Online   | Offline  |
|--------|----------|----------|
| Timing | $N = 24$ | $N = 20$ |

### Cognitive functions

Table S3. Study numerosity of the third meta-regression on accuracy.

|                    | Attention | Episodic memory | Executive functions | Learning | Memory  | Semantic memory | Social cognition | Spatial cognition | Timing  | Working memory |
|--------------------|-----------|-----------------|---------------------|----------|---------|-----------------|------------------|-------------------|---------|----------------|
| Cognitive Function | $N = 2$   | $N = 1$         | $N = 6$             | $N = 1$  | $N = 3$ | $N = 4$         | $N = 9$          | $N = 5$           | $N = 6$ | $N = 7$        |

Table S4. Study numerosity of the third meta-regression on RTs.

|                    | Executive functions | Learning | Music   | Semantic memory | Social cognition | Spatial cognition | Timing  | Working memory |
|--------------------|---------------------|----------|---------|-----------------|------------------|-------------------|---------|----------------|
| Cognitive Function | $N = 6$             | $N = 1$  | $N = 1$ | $N = 11$        | $N = 10$         | $N = 4$           | $N = 1$ | $N = 7$        |

### Cerebellar lateralization

Table S5. Study numerosity of the meta-regression on accuracy and lateralization.

|                 | Left     | Middle  | Right    |
|-----------------|----------|---------|----------|
| Cerebellar site | $N = 16$ | $N = 5$ | $N = 14$ |

Table S6. Study numerosity of the meta-regression on RTs and lateralization.

|                 | Left     | Middle  | Right    |
|-----------------|----------|---------|----------|
| Cerebellar site | $N = 14$ | $N = 6$ | $N = 14$ |

### Signed effect sizes

The forest plots of the meta-analyses on signed effect sizes with  $r = .75$  are reported in Figure S1 (accuracy) and Figure S2 (RTs), respectively.

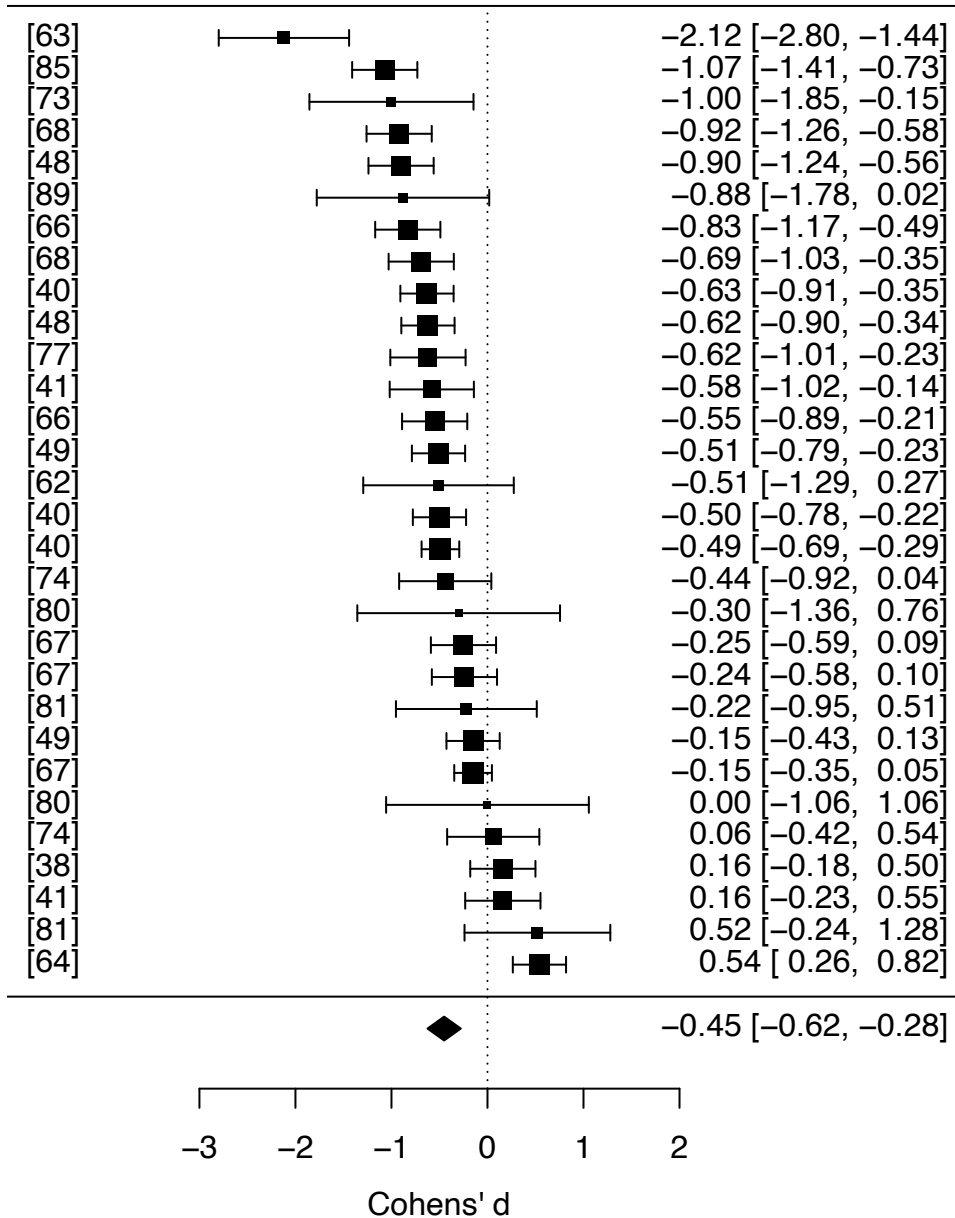

Figure S1. Forest plot of the studies that used accuracy as main dependent variable included in the meta-analysis with signed effect sizes. Each row corresponds to one experiment and the lines beside each square represent 95% confidence interval. The size of each square represents the weight of the study. The diamond at the bottom represents the cumulative effect size with 95% confidence interval. Negative values indicate performance impairment, positive values indicate performance enhancement.

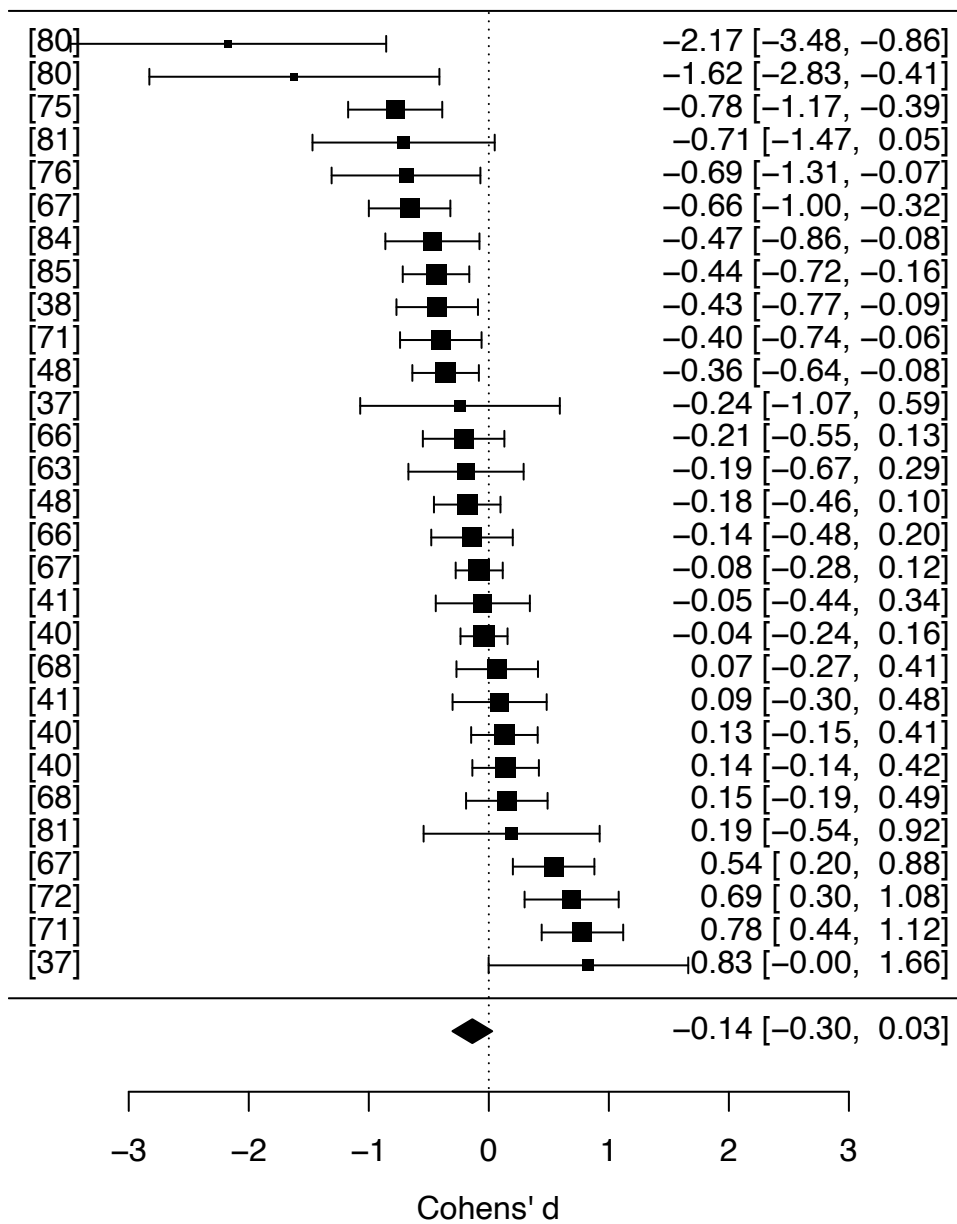

Figure S2. Forest plot of the studies that used RTs as main dependent variable included in the meta-analysis with signed effect sizes. Each row corresponds to one experiment and the lines beside each square represent 95% confidence interval. The size of each square represents the weight of the study. The diamond at the bottom represents the cumulative effect size with 95% confidence interval. Negative values indicate performance impairment, positive values indicate performance enhancement.
